# Supplementary material for: Regulatory role of heme oxygenase-1 in silica-induced lung injury
Source: PubMed Central journal article supplement (PMC6090697; doi:10.1186/s12931-018-0852-6), 2018-08-01

# Additional file 1

A

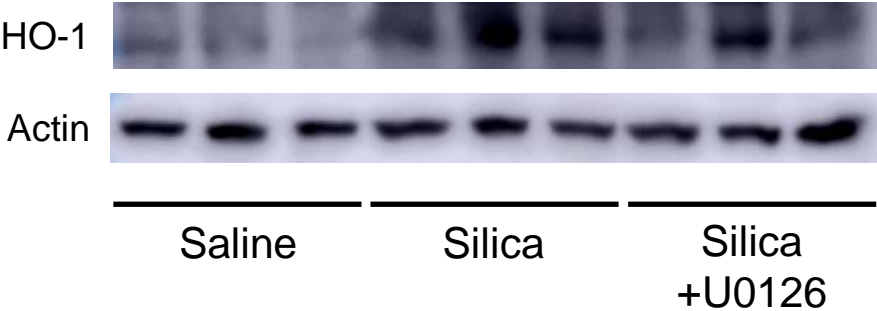

B

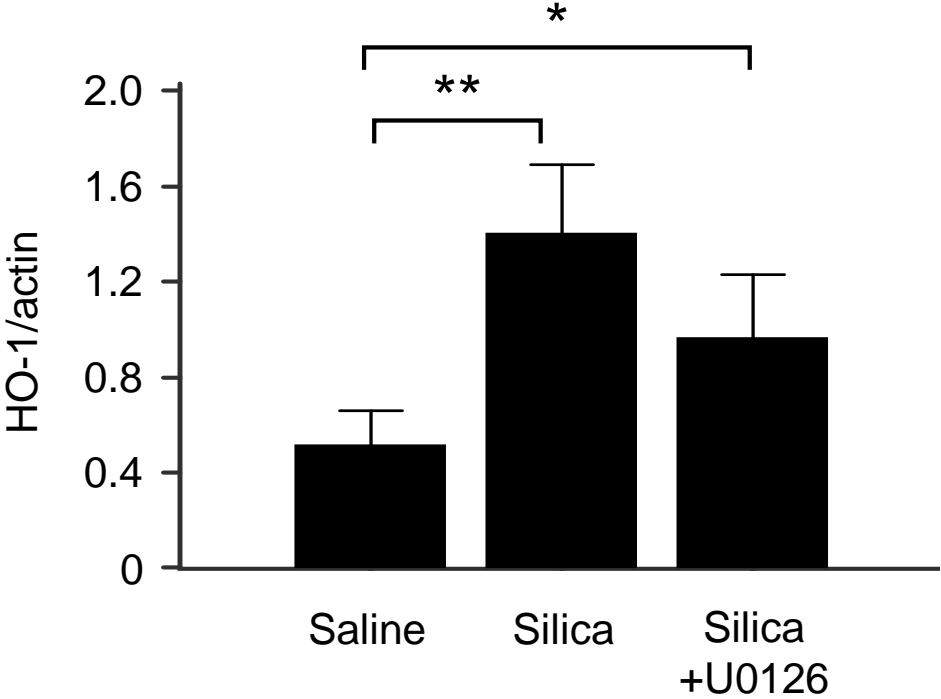

Supplement: 12931_2018_852_MOESM1_ESM.pdf [file 12931_2018_852_MOESM1_ESM.pdf]
